# Supplementary material for: Efficient charge migration in TiO2@PB nanorod arrays with core–shell structure for photoelectrochemical water splitting
Source: Royal Society of Chemistry journal article supplement (doi:10.1039/d1ce01710a), 2022-01-01
Supplement: d1ce01710a1.pdf [file d1ce01710a1.pdf]

## Supporting Information

# Efficient Charge Migration in TiO<sub>2</sub>@PB Nanorod Arrays with Core-shell Structure for Photoelectrochemical Water Splitting

Guobing Mao <sup>#a</sup>, Chunxiao Li <sup>#a</sup>, Zhengdao Li <sup>b</sup>, Miao Xu <sup>\*a</sup>, Heng Wu <sup>a</sup>, and Qi Liu <sup>\*a</sup>

<sup>a</sup> School of materials science and engineering, Anhui Polytechnic University, Wuhu, Anhui 241000, China;

<sup>b</sup> Chemistry and Pharmaceutical Engineering College, Nanyang Normal University, Nanyang, Henan 473061, China.

\* Corresponding author. Tel: +86-553-2871-738; E-mail: modieer\_67@ahpu.edu.cn

# Corresponding author. Tel: +86-553-2871-738;; E-mail: 2150130102@ahpu.edu.cn

This work was financially supported by the Natural Science Foundation of Anhui Province (No.2008085ME132 ), Talent Project of Anhui Province (Z175050020001), the key Project of Anhui Provincial Department of Education (No. KJ2019A0157).

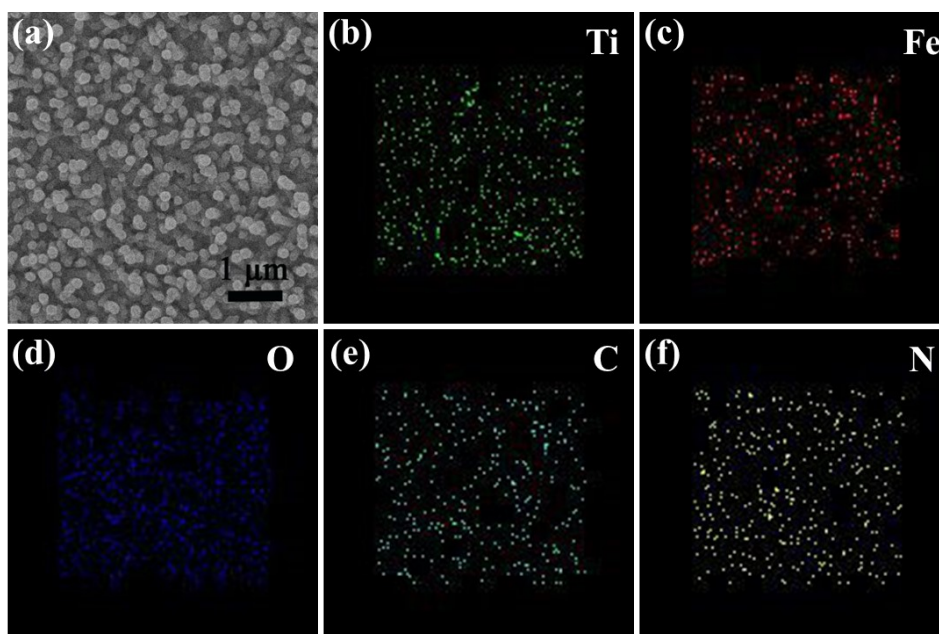

**Fig. S1** (Color online) (a) SEM image of  $\text{TiO}_2@\text{PB}$ , SEM elemental mapping of (b) Ti, (c) Fe, (d) O, (e) C and (f) N.

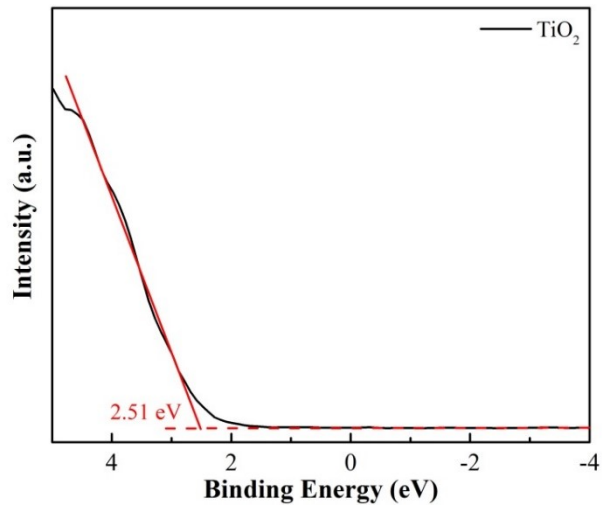

Fig. S2 (Color online) Valence band spectra of TiO<sub>2</sub>.

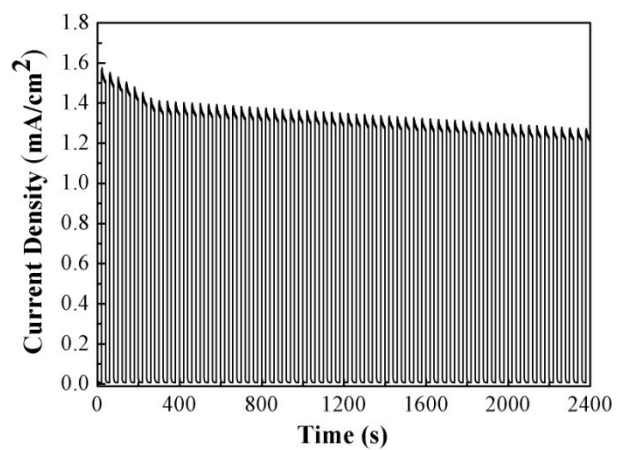

**Fig. S3** Stability test of TiO<sub>2</sub>@PB photoelectrode conducted under chopped illumination for 2400 s.

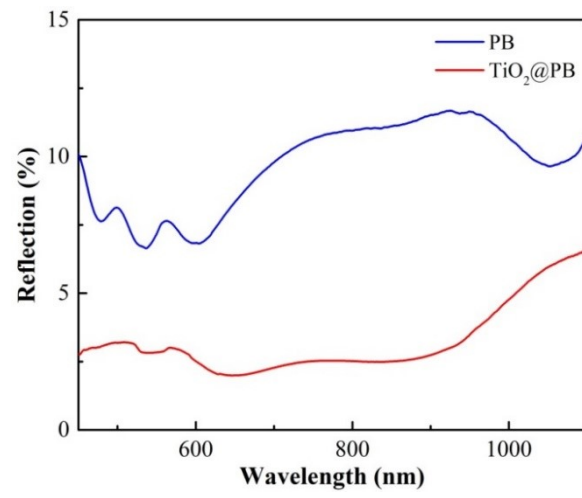

**Fig. S4** Reflectance spectra of the PB and TiO<sub>2</sub>@PB film in the colored state.

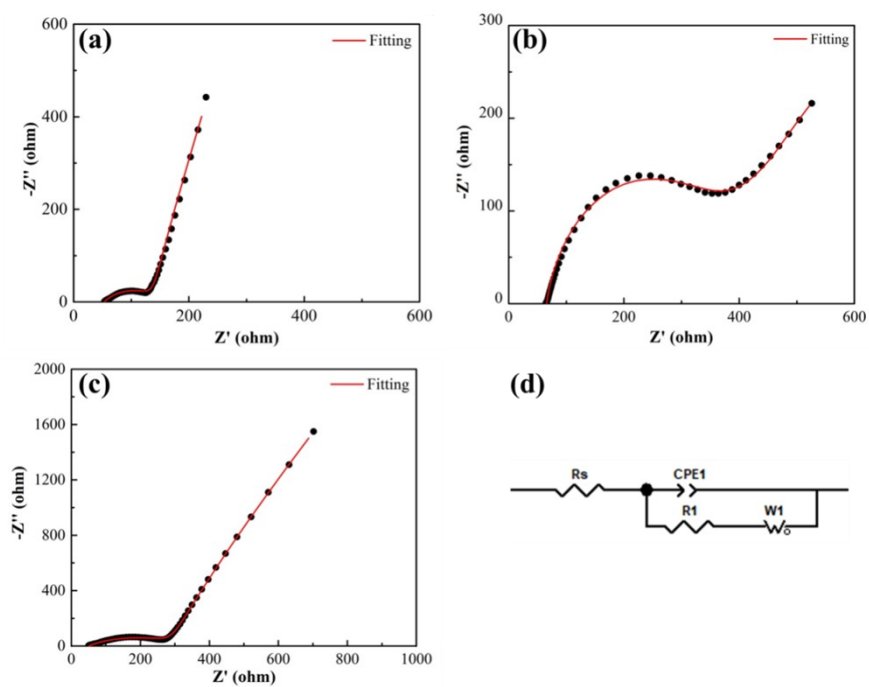

**Fig. S5** Nyquist plots of the electrode (black) and fitting (red): (a) PB, (b)  $\text{TiO}_2$ , (c)  $\text{TiO}_2@PB$ . (d) the equivalent circuit used for fitting the experimental impedance data.

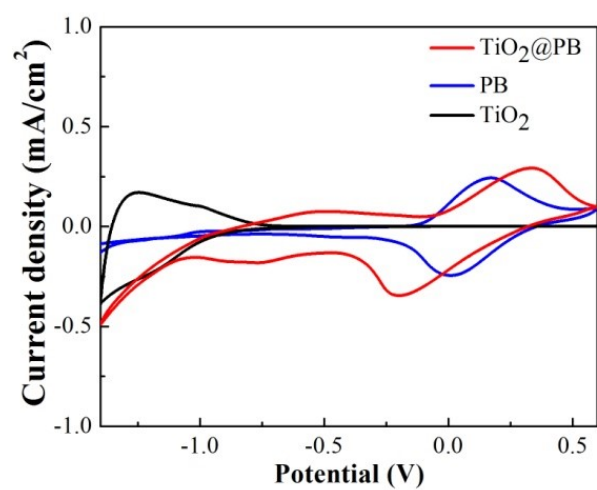

**Fig. S6** Cyclic voltammetry (CV) curves at a scan rate of 20 mV s<sup>-1</sup> for PB, TiO<sub>2</sub> and TiO<sub>2</sub>@PB films
